# Supplementary material for: Resistance to CTLA-4 checkpoint inhibition reversed through selective elimination of granulocytic myeloid cells
Source: PubMed Central journal article supplement (PMC5593525; doi:10.18632/oncotarget.18437), 2017-06-11
Supplement: oncotarget-08-55804-s001.pdf [file oncotarget-08-55804-s001.pdf]

## Resistance to CTLA-4 checkpoint inhibition reversed through selective elimination of granulocytic myeloid cells

### SUPPLEMENTARY MATERIALS

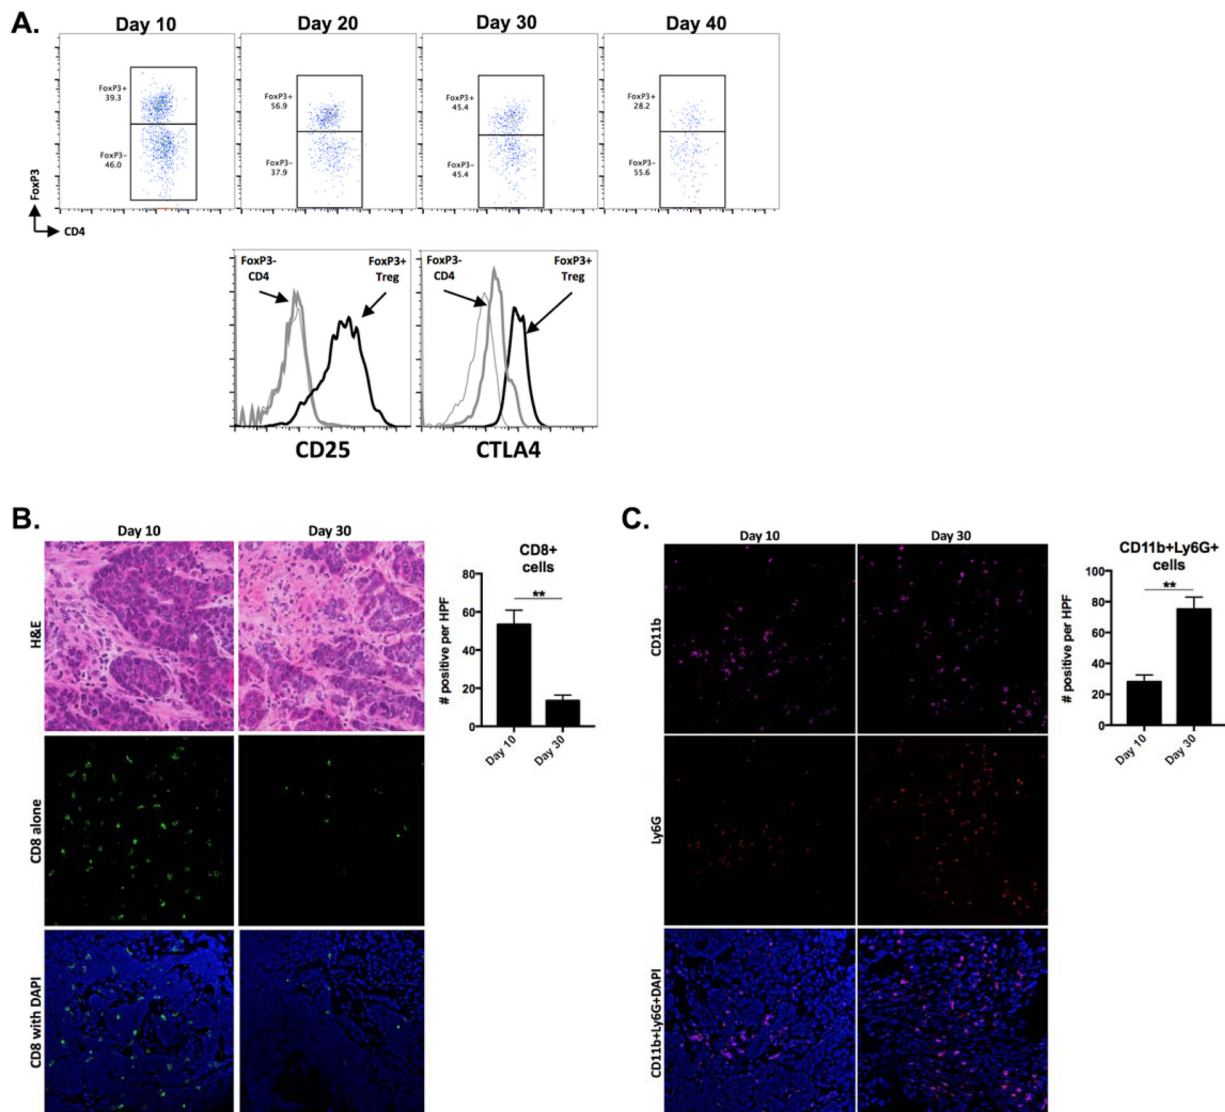

**Supplementary Figure 1: Tumor accumulation of CD25 and CTLA-4 positive FoxP3+CD4+ Tregs decreased with tumor progression and infiltration of CD8+ T-lymphocytes and Ly6G+ myeloid cells by immunofluorescence correlated with flow cytometry findings.** A, Representative dotplots of CD4<sup>+</sup> TIL from tumors harvested 10, 20, 30 or 40 days after tumor implantation. Representative histograms of CD25 and CTLA4 expression on FoxP3 positive and negative CD4<sup>+</sup> TIL. Thin grey line is isotype control. Tumors from day 10 and 30 after tumor implantation were sectioned and analyzed for CD8<sup>+</sup> (B) and CD11b<sup>+</sup>Ly6G<sup>+</sup> (C) cell infiltration by immunofluorescence. Top left panels are H&E stained. Bottom panels counterstained with DAPI. Images obtained at 20x on a confocal microscope. Quantified with ImageJ software.

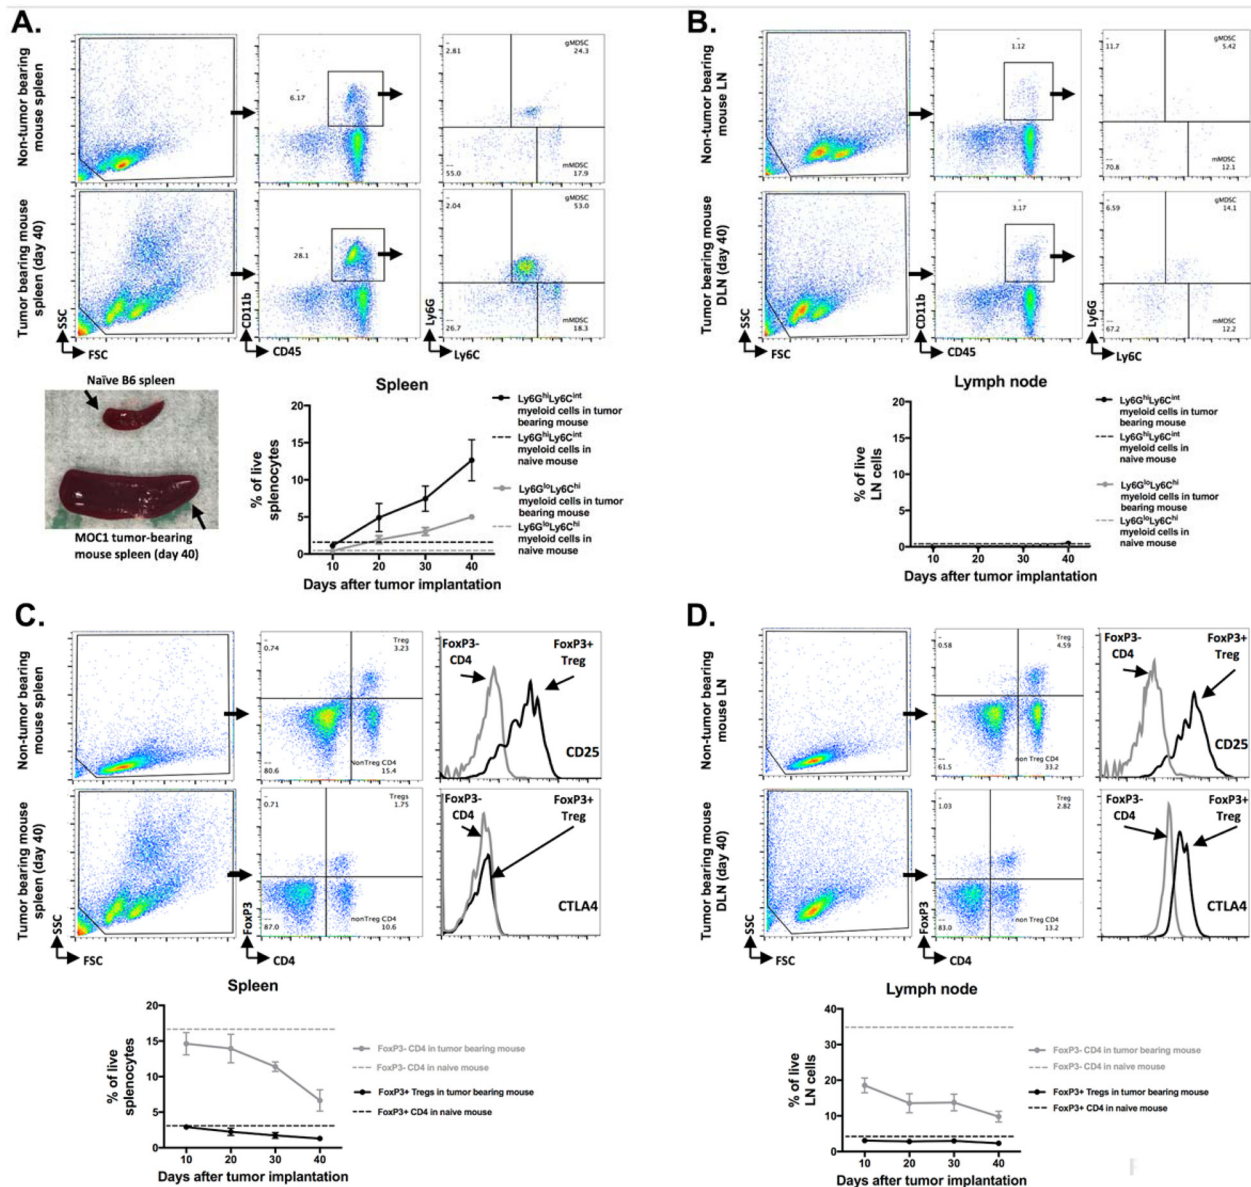

**Supplemental Figure 2: Spleens of MOC1 tumor-bearing mice accumulated Ly6G<sup>hi</sup>Ly6C<sup>int</sup> myeloid cells but not Tregs with tumor progression.** Gating strategy (dotplots) and quantification of Ly6G<sup>hi</sup>Ly6C<sup>int</sup> myeloid cells and Ly6G<sup>lo</sup>Ly6C<sup>hi</sup> myeloid cells in spleens (A) and tumor-draining lymph nodes (B) of MOC1 tumor-bearing mice at days 10, 20, 40 and 40 after tumor implantation (n=5/time point). Dotted lines represent levels in naïve non-tumor bearing mice. Photograph of a representative naïve and MOC1 tumor-bearing mouse spleen. Gating strategy (dotplots) and quantification of T<sub>reg</sub>s in spleens (C) and tumor-draining lymph nodes (D) of MOC1 tumor-bearing mice. Representative histograms of CD25 and CTLA4 expression on FoxP3 positive and negative CD4<sup>+</sup> T-lymphocytes.

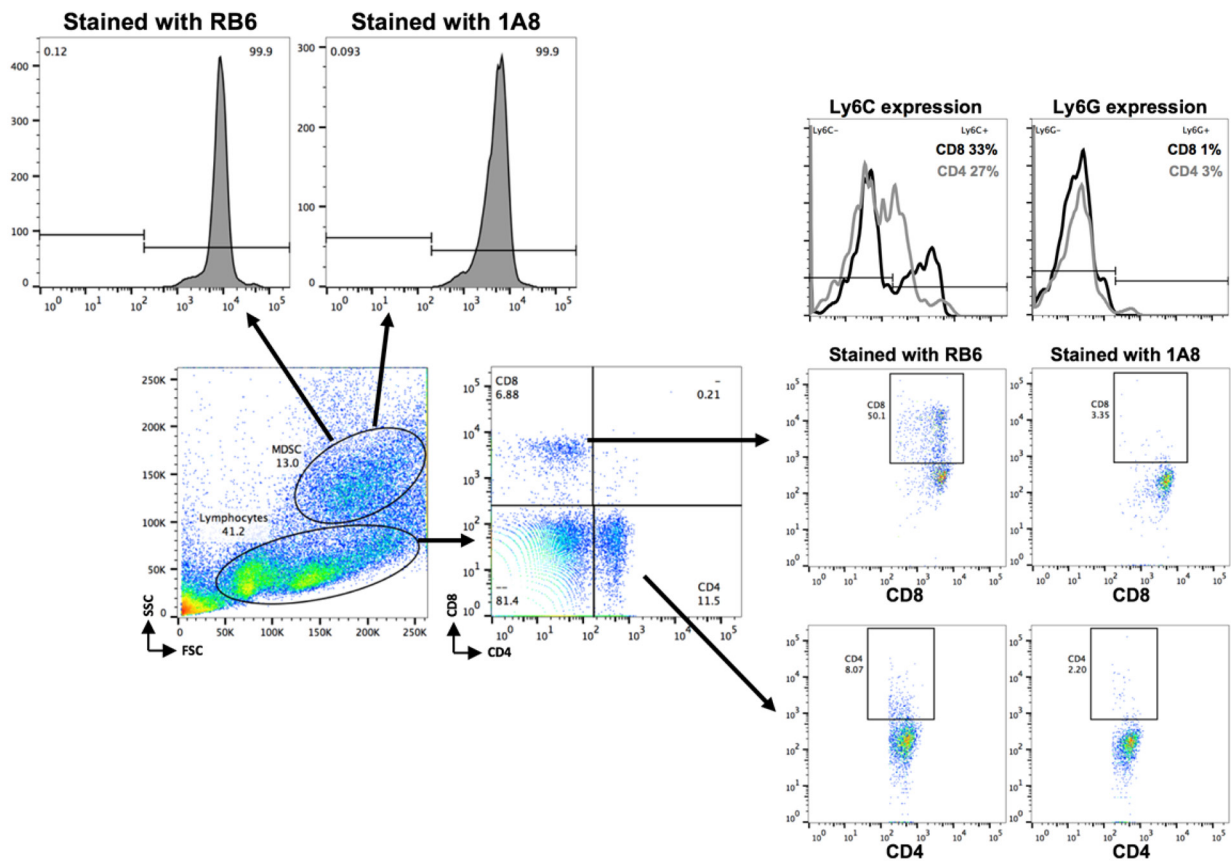

**Supplementary Figure 3: The 1A8 but not RB6-8C5 antibody selectively bound to Ly6G.** Splenocytes from a MOC1 tumor-bearing mouse (day 40) were stained with both 1A8 and RB6-8C5 antibodies. Both 1A8 and RB6-8C5 antibodies bind MDSCs gated from the FSC/SSC plot (top left panels). CD4<sup>+</sup> and CD8<sup>+</sup> lymphocytes were similarly stained (right bottom panels) with 50% of CD8<sup>+</sup> and 8% of CD4<sup>+</sup> T-lymphocytes also staining positive with the RB6 but not the 1A8 antibody. A significant subset of CD8<sup>+</sup> and CD4<sup>+</sup> T-lymphocytes express Ly6C but do not express Ly6G (right top panels).

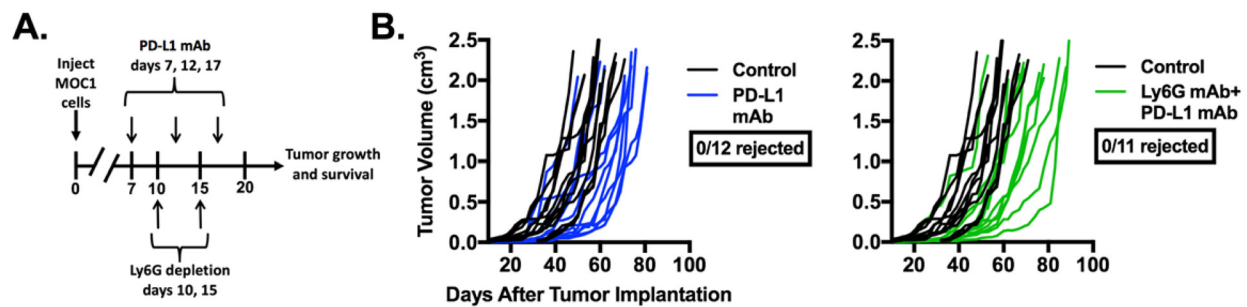

**Supplementary Figure 4: gMDSC depletion plus PD-L1 mAb does not effectively control established MOC1 tumors.** Established MOC1 tumors were treated with Ly6G depleting antibody (clone 1A8, 200  $\mu\text{g}/\text{injection}$ ) and PD-L1 mAb (clone 10F.9G2, 200  $\mu\text{g}/\text{injection}$ ), alone or in combination. A, schematic of Ly6G depletion and checkpoint blockade. B, primary tumor growth plots demonstrate growth curves for treated MOC1 tumors (colored lines) compared to control (black lines).
